# Supplementary material for: Dietary liposomal complexes change the fatty acid composition of hepatic bioactive phospholipids in F1(C57blxDBA2\6) mice, as shown by a lipidomic approach
Source: Royal Society of Chemistry journal article supplement (doi:10.1039/d4bm00431k), 2024-01-01
Supplement: d4bm00431k2.pdf [file d4bm00431k2.pdf]

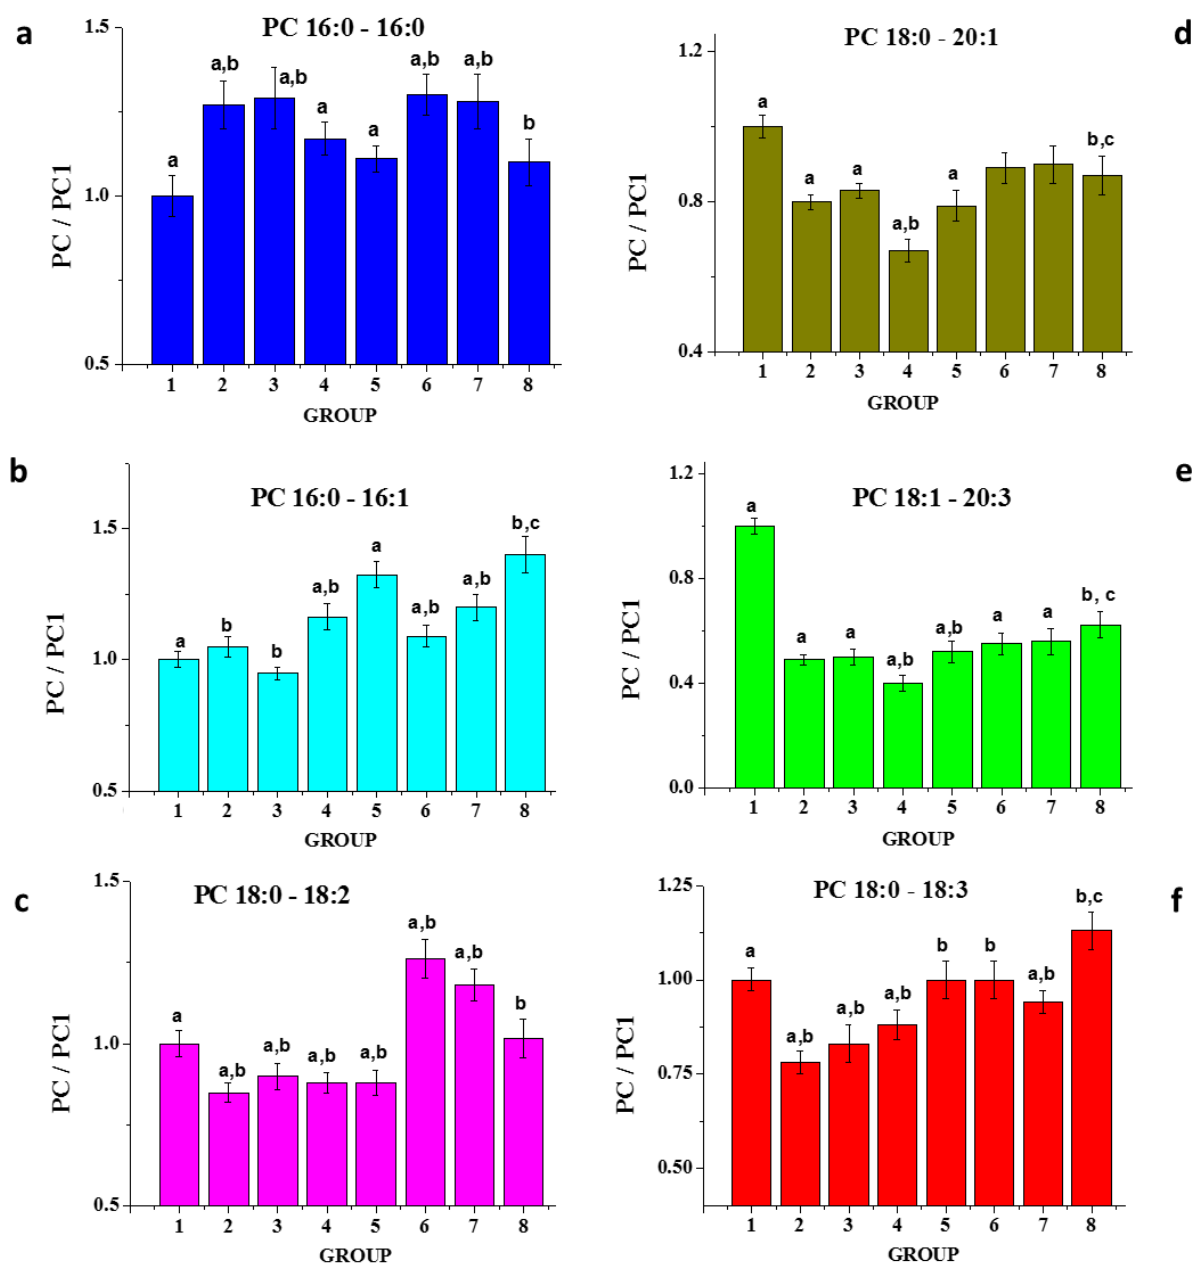

**Fig. S2** The relative content of phosphatidylcholine (PC) molecular species in liver lipids of mice taking various nanoliposomal complexes. Along the abscissa axis: 1-st group – 2-month-old control mice maintained on a normal diet; 2-d group was fed PC; 3-d group was fed (PC+CEO); 4-th group was fed (PC+SC); 5-th group was fed (PC+CEO+SC); 6-th group was fed (PC+FO+SC); 7-th group was fed (PC+FO+CEO+SC) ; 8-th group – control mice aged 5 months, was fed only a standard vivarium diet of dry meals and water throughout the experiment. The content of the corresponding molecular type of PC in the liver of control 2-month-old mice (group 1) was taken as a unit. The values for PC 16:0-16:0 (a), PC 16:0-16:1 (b) PC 18:0-18:2 (c), PC 18:0-20:1 (d), PC 18:1-20:3 (e), and PC 18:0-18:3 (f) were  $5.2 \times 10^7$ ,  $8.5 \times 10^5$ ,  $2.3 \times 10^7$ ,  $1.2 \times 10^7$ ,  $7 \times 10^6$ , and  $3.7 \times 10^6$  (Abs. intens. [arb. units]), respectively. The data are presented as mean ( $n = 6$ )  $\pm$  SD and  $p$

values calculated using unpaired Mann-Whitney and Kruskal tests. The statistical significance is indicated as follows: a -  $p < 0.05$  – in comparison with the 1<sup>st</sup> group, b –  $p < 0.05$  - in comparison with the 8<sup>th</sup> group, and c –  $p < 0.05$  - the 8<sup>th</sup> group in comparison with the 1<sup>st</sup> group.
