# Supplementary material for: Dietary liposomal complexes change the fatty acid composition of hepatic bioactive phospholipids in F1(C57blxDBA2\6) mice, as shown by a lipidomic approach
Source: Royal Society of Chemistry journal article supplement (doi:10.1039/d4bm00431k), 2024-01-01
Supplement: d4bm00431k4.pdf [file d4bm00431k4.pdf]

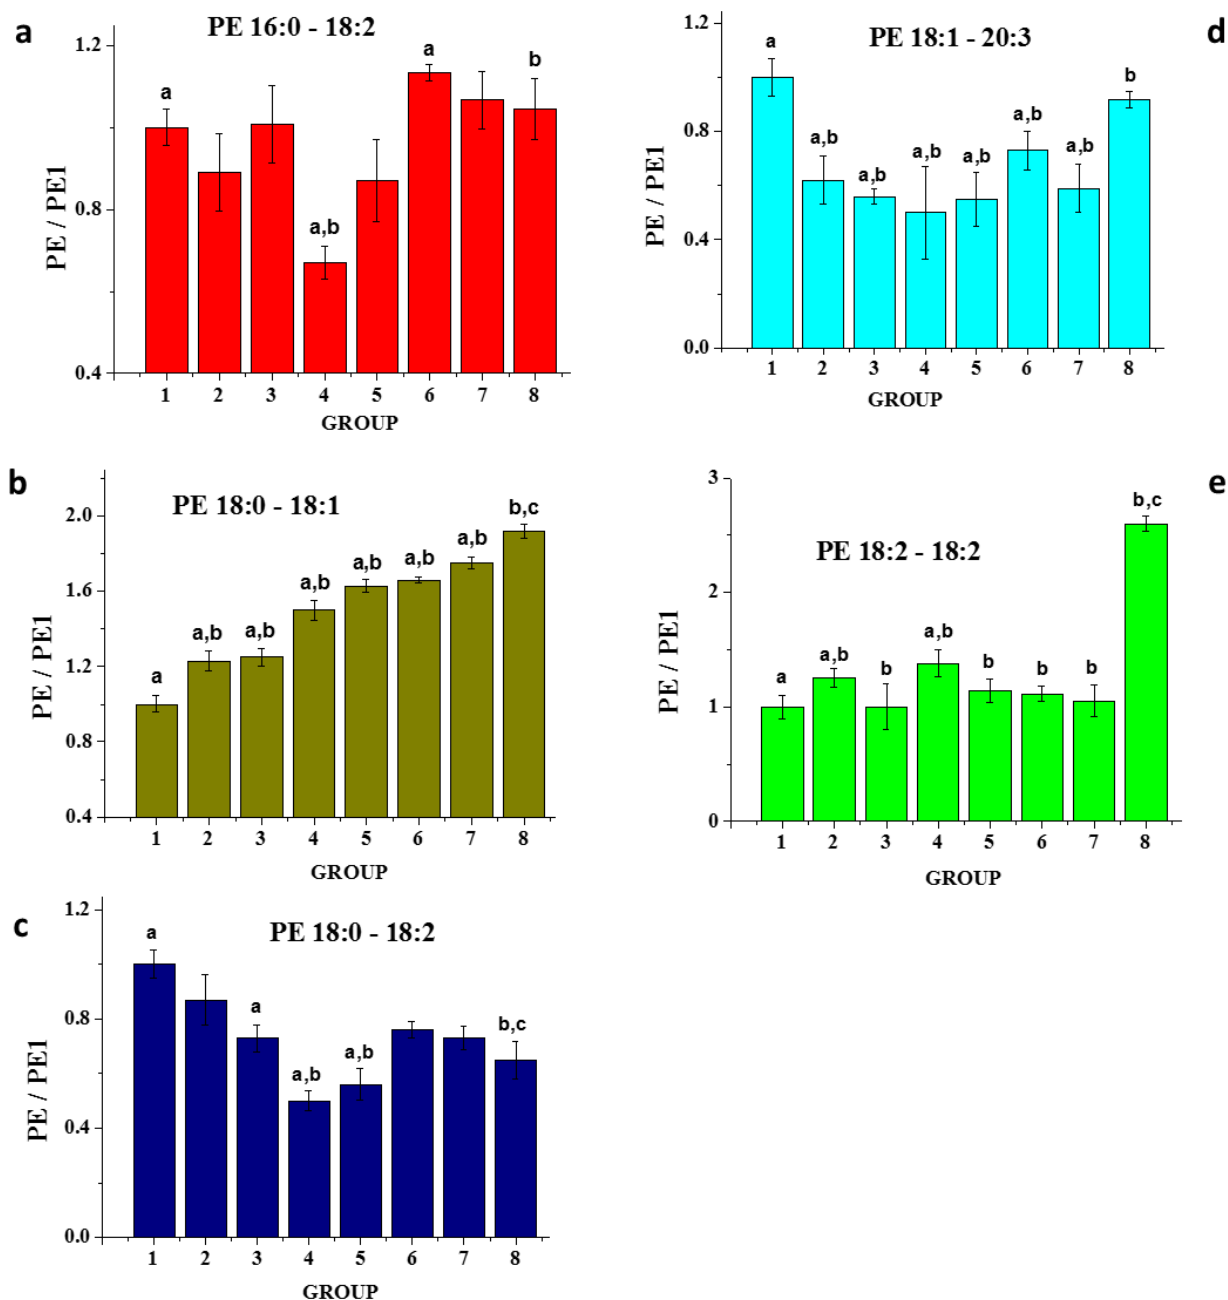

**Fig. S4** The relative content of phosphatidylethanolamine (PE) molecular species in liver lipids of mice taking various nanoliposomal complexes. Along the abscissa axis: 1-st group – 2-month-old control mice maintained on a normal diet; 2-d group was fed PC; 3-d group was fed (PC+CEO); 4-th group was fed (PC+SC); 5-th group was fed (PC+CEO+SC); 6-th group was fed (PC+FO+SC); 7-th group was fed (PC+FO+CEO+SC) ; 8-th group – cjtrol mice aged 5 months, was fed only a standard vivarium diet of dry meals and water throughout the experiment. The content of the corresponding molecular type of PE in the liver of control 2-month-old mice (group 1) was taken as a unit. The values for PE 16:0-18:2 (a), PE 18:0-18:1 (b), PE 18:0-18:2 (c), PE 18:1-20:3 (d), and PE 18:2-18:2 (e) were  $2.7 \times 10^6$ ,  $3 \times 10^6$ ,  $5.8 \times 10^6$ ,  $2.8 \times 10^7$ , and  $1.1 \times 10^7$  (Abs. intens. [arb. units]), respectively. The data are presented as mean ( $n = 6$ )  $\pm$  SD and p values calculated using unpaired Mann-Whitney and Kruskal tests. The statistical significance is indicated as follows: a -  $p < 0.05$  – in comparison with

the 1<sup>st</sup> group, b –  $p < 0.05$  - in comparison with the 8<sup>th</sup> group; c –  $p < 0.05$  - the 8th group in comparison with the 1<sup>st</sup> group.
